# Supplementary material for: Antioxidant modifications induced by the new metformin derivative HL156A regulate metabolic reprogramming in SAMP1/kl (-/-) mice
Source: Aging (Albany NY). 2018 Sep 16;10(9):2338–55. doi: 10.18632/aging.101549 (PMC6188477; doi:10.18632/aging.101549)
Supplement: Supplementary Figure S1 [file aging-10-101549-s003.pdf]

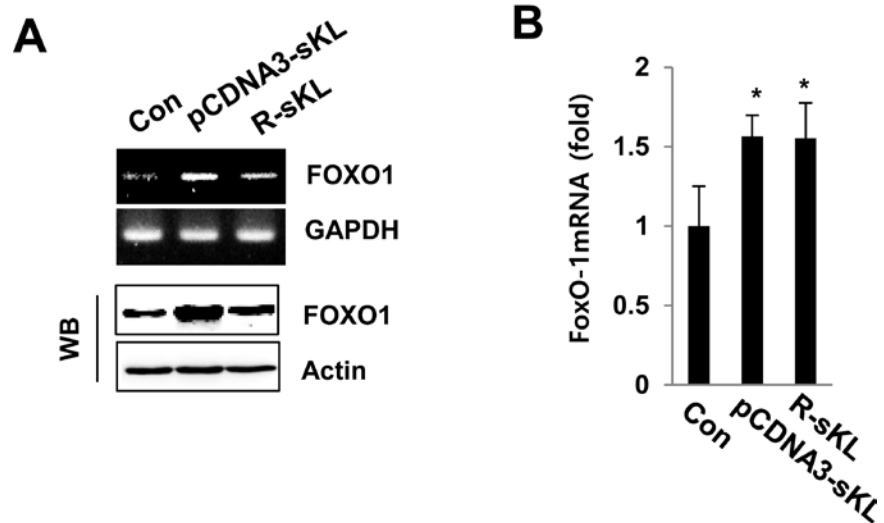

**Supplementary Figure S1. Klotho regulates the expression of FOXO1.** (A) RT-PCR was performed to determine the expression levels of FOXO1 in HEK293 cells. GAPDH was used as an internal control. FOXO1 protein levels were analyzed using Western blot. (B) FOXO1 mRNA levels in HEK293 cells were assessed using real-time RT-PCR analysis. The expression levels were normalized to GAPDH. \* $p < 0.05$ .
