# Supplementary material for: Antioxidant modifications induced by the new metformin derivative HL156A regulate metabolic reprogramming in SAMP1/kl (-/-) mice
Source: Aging (Albany NY). 2018 Sep 16;10(9):2338–55. doi: 10.18632/aging.101549 (PMC6188477; doi:10.18632/aging.101549)
Supplement: Supplementary Figure S3 [file aging-10-101549-s005.pdf]

| ID     | HMT DB<br>Compound name                    | Comparative Analysis |                 |
|--------|--------------------------------------------|----------------------|-----------------|
|        |                                            | Ratio                |                 |
|        |                                            | KL vs Con            | HL156A<br>vs KL |
| C_0038 | Cys                                        | 0.014                | 2.4             |
| C_0093 | Cys-Gly                                    | 0.02                 | 2.0             |
| C_0146 | Glutathione(GSH)                           | 0.03                 | 2.7             |
| C_0145 | Glutathione (GSS<br>H) <sub>divalent</sub> | 3.0                  | 0.8             |

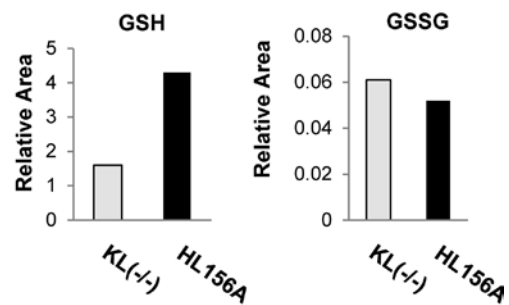

**Supplementary Figure S3. Comparison of the relative amounts of GSSG and GSH metabolites in SAMP1/kl-/- and HL156A-treated SAMP1/kl-/- mouse kidneys.** Columns represent the relative areas, and numbers represent the ratios of the relative amounts of metabolites in SAMP1/kl-/- vs. SAMP1/kl+/+ or HL156A-treated SAMP1/kl-/- vs. SAMP1/kl-/- samples.
