# Supplementary material for: Antioxidant modifications induced by the new metformin derivative HL156A regulate metabolic reprogramming in SAMP1/kl (-/-) mice
Source: publisher site journal article supplement (doi:10.18632/aging.101549), 2018-09-16
Supplement: Supplementary file [file aging-v10i9-101549-supplementary-material-SD6.pdf]

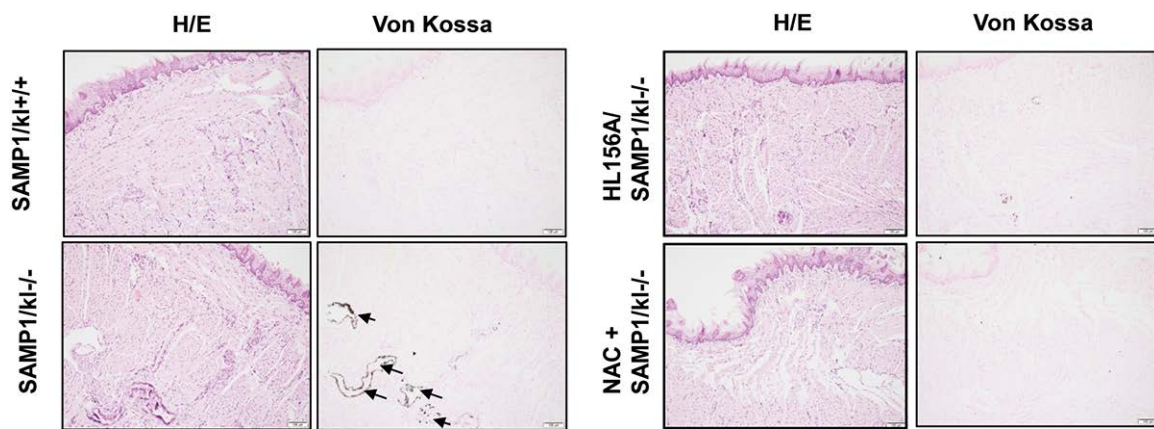

**Supplementary Figure S4. Tongue tissue sections labeled with von Kossa stain.** Photomicrographs of tongue sections of SAMP1/kl<sup>-/-</sup> and HL156A- or nicotinamide (NAC)-treated SAMP1/kl<sup>-/-</sup> mice.
